# Supplementary material for: Gas bubble dynamics in soft materials
Source: Royal Society of Chemistry journal article supplement (doi:10.1039/c4sm02037e), 2014-11-03
Supplement: c4sm02037e1.pdf [file c4sm02037e1.pdf]

## Supplementary Information:

### “Gas bubble dynamics in soft materials”

J. M. Solano-Altamirano,<sup>a)</sup> John D. Malcolm,<sup>b)</sup> and Saul Goldman<sup>c)</sup>

*Dept. of Chemistry, the Guelph-Waterloo Centre for Graduate Work in Chemistry and the Guelph-Waterloo Physics Institute, University of Guelph, Guelph, Ontario, N1G 2W1, Canada*

(Dated: 5 November 2014)

**Supp. Info. Abstract:** Here we provide tables of numerical values of dissolving times for a bubble embedded in an soft elastic medium. These values are intended to serve as benchmarks for those readers who may want to check their work against ours.

#### I. $(\partial c/\partial r)_R$ FROM THE DIFFUSION EQUATION

The dissolving time for a bubble embedded in an elastic medium is found by numerically solving the differential equation

$$\frac{dR}{ds} = \frac{6BTD^*(P_{WSR} - P_e + 4G/3 - 2\gamma/R)}{(3P_eR + 4\gamma - 4GR)K_H} \left\{ s + \frac{R}{\sqrt{\pi D^*}} \right\}, \quad (1)$$

which is obtained by combining Eqs. (10), (14), and (15) from the main article, together with the change of variable

$$t = s^2. \quad (2)$$

This change of variable eliminates the singularity at  $t = 0$  (see Section 3 of the main article).

A tabulated series of dissolving times for different combinations of the shear modulus  $G$ , and initial radius  $R_0$  is given in Table I.

---

<sup>a)</sup>Electronic mail: jmsolanoalt@gmail.com

<sup>b)</sup>Electronic mail: malcolmj@uoguelph.ca

<sup>c)</sup>Electronic mail: sgoldman@uoguelph.ca

|                       | $t_d(R_0, G) \times \text{sec}^{-1}$<br>(( $\partial c/\partial r$ ) <sub>R</sub> from the Diffusion equation.) |                     |                     |                     |
|-----------------------|-----------------------------------------------------------------------------------------------------------------|---------------------|---------------------|---------------------|
| $R_0 \times \mu^{-1}$ | $G = 0.0\text{atm}$                                                                                             | $G = 0.1\text{atm}$ | $G = 0.2\text{atm}$ | $G = 0.3\text{atm}$ |
| 5                     | 0.4741                                                                                                          | 0.5365              | 0.6483              | 0.9195              |
| 10                    | 2.477                                                                                                           | 3.119               | 4.808               | $\infty$            |
| 15                    | 6.337                                                                                                           | 8.546               | 16.38               | $\infty$            |
| 20                    | 12.16                                                                                                           | 17.21               | 40.19               | $\infty$            |
| 25                    | 20.01                                                                                                           | 29.33               | 82.27               | $\infty$            |
| 30                    | 29.9                                                                                                            | 45.04               | 150.3               | $\infty$            |

TABLE I. Dissolving times obtained numerically from Eq. (1). Here we have used  $T = 298.15 \text{ K}$ ,  $P_e = 1 \text{ atm}$ ,  $P_{WSR} = 0.75 \text{ atm}$ ,  $D^* = 2900 \mu^2/\text{sec}$ ,  $\gamma = 0.7 \mu \cdot \text{atm}$  (70 dynes/cm),  $B = 0.082057 \text{ atm} \cdot \text{l} \cdot \text{mol}^{-1} \cdot \text{K}^{-1}$ , and  $K_H = 1614 \text{ atm} \cdot \text{l} \cdot \text{mol}^{-1}$ .

## II. ( $\partial c/\partial r$ )<sub>R</sub> FROM THE LAPLACE EQUATION

The time evolution of a bubble embedded in a soft elastic material, using ( $\partial c/\partial r$ )<sub>R</sub> obtained from the Laplace equation (Eq. (17) in the main paper), is given by

$$t = \frac{1 - \alpha}{2D^*d(1 - f - \alpha)}(R_0^2 - R^2) - \frac{2\gamma(2f + 1 - \alpha)}{3D^*d(1 - f - \alpha)^2P_e}(R_0 - R) + \frac{4\gamma^2(2f + 1 - \alpha)}{3D^*d(1 - f - \alpha)^3P_e^2} \ln \left( \frac{(1 - f - \alpha)R_0P_e + 2\gamma}{(1 - f - \alpha)RP_e + 2\gamma} \right), \quad (3)$$

where

$$d \equiv \frac{BT}{K_H}, \quad f \equiv \frac{P_{WSR}}{P_e}, \quad \text{and} \quad \alpha \equiv \frac{4G}{3P_e} \quad (4)$$

Equation (3) has physical units and is equivalent to Eq. (26) of the main paper.

The dissolving times shown in Table II were obtained from:

$$t_d = \frac{1 - \alpha}{2D^*d(1 - f - \alpha)}R_0^2 - \frac{2\gamma(2f + 1 - \alpha)}{3D^*d(1 - f - \alpha)^2P_e}R_0 + \frac{4\gamma^2(2f + 1 - \alpha)}{3D^*d(1 - f - \alpha)^3P_e^2} \ln \left( \frac{(1 - f - \alpha)R_0P_e + 2\gamma}{2\gamma} \right), \quad (5)$$

which was obtained from Eq. (3) with  $R$  set equal to 0.

|            | $t_d(R_0, G) \times \text{sec}^{-1}$<br>$((\partial c/\partial r)_R \text{ from the Laplace equation.})$ |                     |                     |                     |
|------------|----------------------------------------------------------------------------------------------------------|---------------------|---------------------|---------------------|
| $R_0(\mu)$ | $G = 0.0\text{atm}$                                                                                      | $G = 0.1\text{atm}$ | $G = 0.2\text{atm}$ | $G = 0.3\text{atm}$ |
| 5          | 0.5316                                                                                                   | 0.5982              | 0.7172              | 1.004               |
| 10         | 2.74                                                                                                     | 3.417               | 5.189               | $\infty$            |
| 15         | 6.965                                                                                                    | 9.286               | 17.44               | $\infty$            |
| 20         | 13.32                                                                                                    | 18.61               | 42.42               | $\infty$            |
| 25         | 21.86                                                                                                    | 31.6                | 86.27               | $\infty$            |
| 30         | 32.61                                                                                                    | 48.42               | 156.8               | $\infty$            |

TABLE II. Dissolving times obtained from Eq. (5). Here we have used  $T = 298.15 \text{ K}$ ,  $P_e = 1 \text{ atm}$ ,  $P_{WSR} = 0.75 \text{ atm}$ ,  $D^* = 2900 \mu^2/\text{sec}$ ,  $\gamma = 0.7 \mu \cdot \text{atm}$  (70 dynes/cm),  $B = 0.082057 \text{ atm} \cdot \text{l} \cdot \text{mol}^{-1} \cdot \text{K}^{-1}$ , and  $K_H = 1614 \text{ atm} \cdot \text{l} \cdot \text{mol}^{-1}$ .
